# Supplementary material for: CD8<sup>+</sup> T cells are present at low levels in the white matter with physiological and pathological aging
Source: publisher site journal article supplement (doi:10.18632/aging.104043), 2020-10-11
Supplement: Supplementary file [file aging-v12i19-104043-supplementary-material-SD1.pdf]

### White Matter

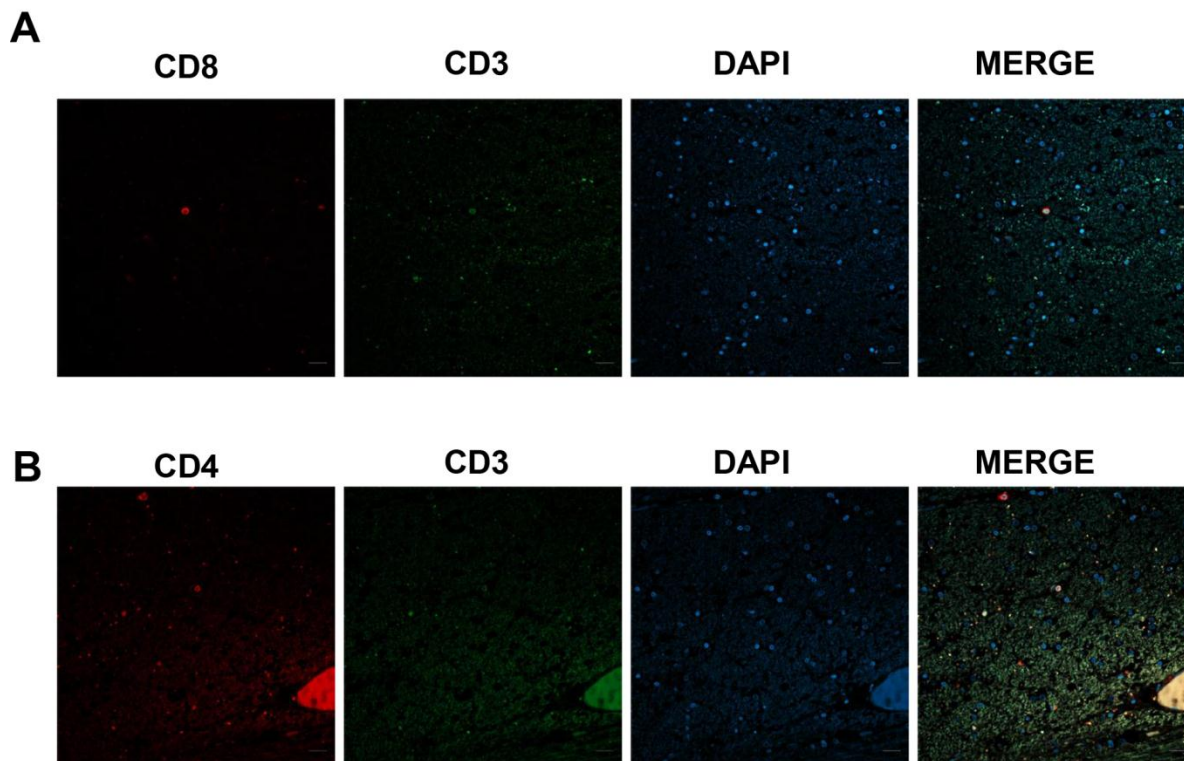

**Supplementary Figure 1. Presence of cytotoxic CD8<sup>+</sup> cells in white matter of patients with neurodegenerative diseases. (A)** Co-immunofluorescence of CD8 with CD3 marker. **(B)** Co-immunofluorescence of CD3 with CD4 marker (n=2). Cell nuclei were counterstained with DAPI. Scale bar: 20  $\mu$ m.

## Entorhinal Cortex

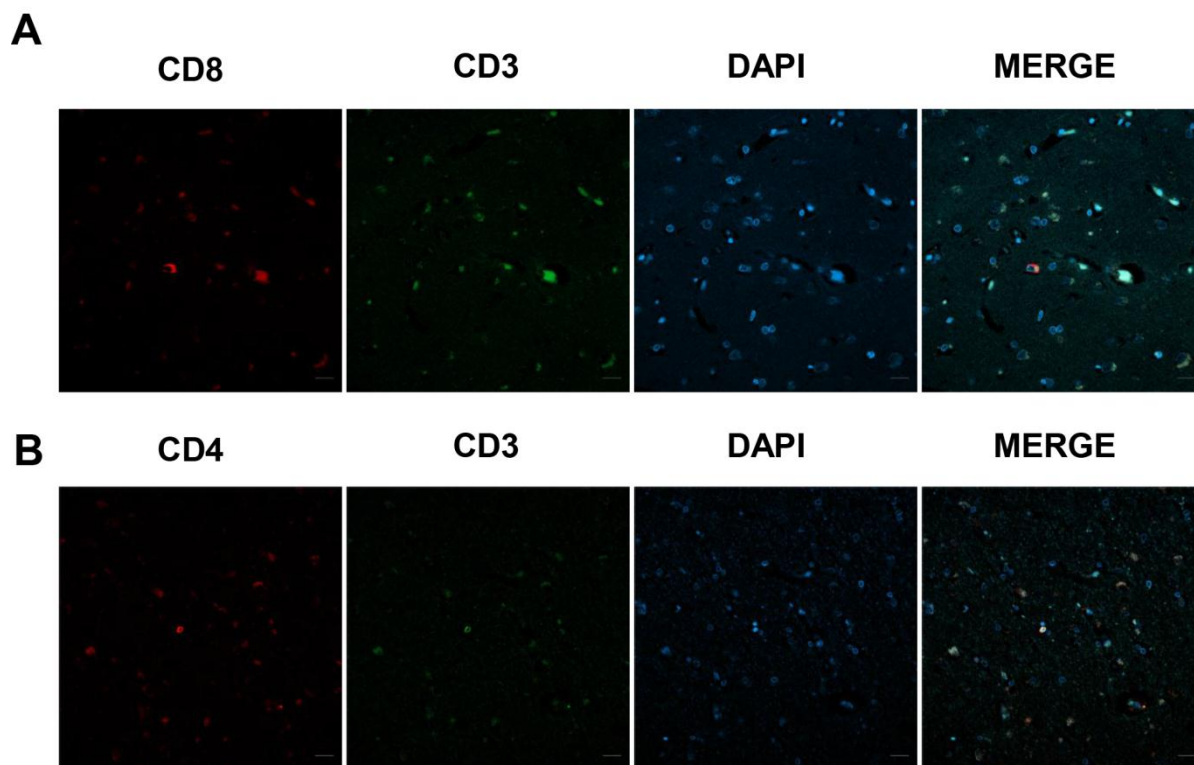

**Supplementary Figure 2. Presence of cytotoxic CD8<sup>+</sup> cells in entorhinal cortex of patients with neurodegenerative diseases.** (A) Co-immunofluorescence of CD8 with CD3 marker. (B) Co-immunofluorescence of CD3 with CD4 marker (n=2). Cell nuclei were counterstained with DAPI. Scale bar: 20  $\mu$ m.
